# Supplementary material
Source: publisher figshare collection journal article supplement (https://tandf.figshare.com/articles/dataset/_/8137745)
Supplement: Supplementary file 1 [file 1]

***Supplementary materials for:***

**Genetic diversity and host adaptation of avian H5N1 influenza viruses during human infection**

**Matthijs R.A. Welkers1*, Hana A. Pawestri2*, Judith M. Fonville1,3,5*, Ondri D. Sampurno2, Maarten Pater1, Melle Holwerda1, Alvin Han1, 4, Colin A. Russell1, Rienk E. Jeeninga1, Vivi Setiawaty2, Menno D. de Jong1# and Dirk Eggink1#**

**Author details**

**1Department of Medical Microbiology, Academic Medical Center, Amsterdam, The Netherlands; 2National Institute of Health Research and Development, Ministry of Health, Jakarta, Indonesia; 3Department of Zoology, University of Cambridge, Cambridge, United Kingdom; 4 Bioinformatics Institute, A*STAR, Singapore, Singapore; 5current Address: Department of Medical Microbiology, PAMM, Veldhoven, The Netherlands**

*** These authors contributed equally.**

**#Corresponding author:** [**w.d.eggink@amc.nl**](mailto:w.d.eggink@amc.nl) **(DE);** [**m.d.dejong@amc.nl**](mailto:m.d.dejong@amc.nl) **(MDdJ)**

***Experimental procedures***

*Clinical samples human influenza A/H5N1 infection*

As part of the national procedure for avian influenza case investigation in Indonesia, respiratory specimens were collected from suspected H5N1 cases and sent to the national reference laboratory for influenza at the National Institute of Health Research and Development (NIHRD) in Jakarta. The NIHRD is the reference laboratory under the Indonesian Ministry of Health responsible for laboratory testing and event-based surveillance of emerging infectious diseases in humans, including avian influenza A/H5N1 virus. Because Indonesian clinical specimens are obtained from suspected H5N1 cases as part of the national outbreak procedure for HPAI H5N1 case investigations, requirement for informed consent has been waived by the Indonesian Ministry of Health. Samples were stored at –800C following laboratory confirmation by polymerase chain reaction (PCR)-based diagnostics. From the specimen repositories available at NIHRD we studied 52 respiratory tract specimens from 44 patients who were diagnosed with A/H5N1 infection between 2006 and 2011, representing more than a quarter of the total number of 163 reported Indonesian patients during this period. Demographic and clinical data of these patients are shown in Table S1.

Specimen selection was based on a maximum cycle threshold (CT) value of 33 in the diagnostic RT-PCR to guarantee sufficient target RNA for whole genome amplification, and/or the availability of sequential samples. Sequential specimens collected at 1-2 day intervals were available from 8 patients, including serial throat swabs from 5 patients and serial nose swabs, bronchial suctions and endotracheal washes from one patient each.

**Table S1. Overview of demographic and clinical characteristics of H5N1-infected patients.**

| **Median age (range)** | 18 (2 – 42) | |
| --- | --- | --- |
| **Gender** | Female  Male | 26  18 |
| **Year of infection** | 2006  2007  2008  2009  2010  2011 | 9  11  7  10  6  1 |
| **Geographical origin** | Banten, Indonesia  Central Java, Indonesia  Jakarta, Indonesia  East Java, Indonesia  Riau (Sumatra) , Indonesia  West Java, Indonesia | 11  2  14  1  2  14 |
| **Days after symptom onset*** | Median: 9 (4 – 15) |  |
| **Ct value** | Average 30.1 (21.5-39.1) |  |
| **Antiviral treatment** | Yes  No | 26  18 |
| **Clinical outcome** | Survival  Death | 1  43 |
| **Type of specimen** | Bronchial suction  Endotracheal aspirate  Nasal swab  Pleural fluid  Throat swab | 4  8  5  6  21 |

* at collection of initial specimens

**Table S2. Detailed demographic and clinical characteristics of H5N1-infected patients.**

*RNA extraction, cDNA synthesis and PCR amplification*

For the human H5N1 samples 200µl of clinical sample was added to 400µl lysis-binding buffer (High pure RNA isolation kit, Roche) and RNA extraction was subsequently performed using the High Pure RNA isolation kit (Roche) with an on-column DNase treatment according the manufacturer’s protocol. Total RNA was eluted in a volume of 50µl elution buffer (Roche) and directly used for reverse transcription and amplification. cDNA was synthesized using the Uni12M primer (AGCRAAAGCAGG) 1 and the Superscript III First-Strand Synthesis System according to the manufacturer’s protocol (Invitrogen), followed by amplification of the whole genome in an overlapping amplicon approach using degenerative primer sets (primer sequences available upon request) 2,3. PCR reactions were performed using Platinum Taq DNA Polymerase High Fidelity (Invitrogen). Thermal cycling conditions were: denaturation at 95oC for 5 minutes; 40 cycles of 95°C for 30 seconds, 50°C for 30 seconds, 68°C for 1 minute; and final extension at 68°C for 5 min.

*Next generation sequencing and quality control*

## For each sample, 5µl of PCR product was combined and the DNA concentration of the PCR mixture was determined using the Qubit dsDNA high sensitive assay kit (Invitrogen). Samples were diluted to a DNA concentration of 50 ng/µl followed by ligation of 454 sequencing adaptors and molecular identifier (MID) tags using the SPRIworks Fragment Library System II for Roche GS FLX* DNA Sequencer (Beckman Coulter), excluding fragments smaller than 350 basepairs, according to the manufacturers protocol to allow for multiplex sequencing per region. The quantity of properly ligated fragments was determined based on the incorporation efficiency of the fluorescent primers using FLUOstar OPTIMA (BMG Labtech). Emulsion PCR, bead recovery and enrichment were performed manually according to the manufacturers protocol (Roche) and samples were sequenced in Roche FLX+ 454. Standard flowgram format (sff) files containing the filter passed reads were split based on the molecular identifier (MID) sequences into separate sample-specific fastq files using the readset parser function of the QUASR package version 7.0 4. After removal of primer and adapter sequences by trimming the first and last 30 nucleotides of each read, an error-correction procedure was performed on all MID-split, primer-removed datasets as follows. First, nucleotides with a phred score below 28 were removed from the 3’-end of the sequence read until the first occurrence of a nucleotide with a phred score of 28 or higher. Second, a minimal median per read quality of phred 30 and minimal resulting read length of 50 nucleotides was assured using the quality control function of the QUASR version 7.0.1 (settings –m 30 –l 50). All reads were subsequently mapped to clade 2.1 reference sequence A/Indonesia/5/2005 (taxonomy ID400788) using the Burrows-Wheeler Aligner (BWA) version 0.6.1-r104 (bwasw mapping option with default settings) 5. Sequence alignment map (SAM)-files were parsed to remove both the unmapped and multiple mapped reads while preserving the mapped read with the highest mapping quality, generating the final cleaned datasets 6.

The amino acid variation in each sample was determined by first correcting each mapped read for insertions and deletions based on the reads’ CIGAR string and subsequent translation in three possible open reading frames (ORFs), disregarding codons that contained 1 or more nucleotides with a phred score below 20 (corresponding to an error rate of 0.1%). An amino acid overview was created for the proteins PB2, PB1, PB1-F2, PA, HA, NA, NP, M1, M2, NS1 and NS2 using the correct ORF positions. All amino acid positions covered by primers used in PCR amplification were discarded for analysis as residual (mutated) primer sequences might cause artificial sequence variation. Throughout the manuscript, the H5 numbering system is used 7.

Following amplification of extracted RNA, NGS (Roche 454) and pre- and post-mapping quality control, we obtained on average 29.005 sequence reads per sample (median 24.140, range: 1.398 - 132.137) of the 52 samples (including 8 sequential samples), with near full genome coverage (**Figure S1**).

**Figure S1. The average depth of coverage of next generation sequencing after quality control for human H5N1 specimens (n=52)**

*Threshold settings for variants*

The following criteria were used for inclusion of a variant in our analyses: a minimum proportion of the variant within the sample of 1% (to mitigate the effects of amplification and sequencing errors 4,7-9, and a minimum of 5 sequence reads for the variant. Sensitivity analyses using different threshold settings are shown below under “*Sensitivity analyses*”. This data selection, and all subsequent analyses were performed in Matlab R 2015 (The Mathworks), unless otherwise indicated.

*Polymerase activity (minigenome) assay.*

A consensus sequence was determined for al chicken isolates from Indonesia (GISAID) and the closest isolate was selected: isolate A/chicken/Indonesia/BL/2003. This virus isolate was used to further investigate polymerase activity. The open reading frame (coding region) of the PB2, PB1, PA and NP genes was cloned into the pPPI4 expression vector10 using Gibson assembly (New England Biolabs). Mutations in PB2, PB1 and PA (Table S10) were introduced using QuikChange II Site-Directed Mutagenesis Kit (Agilent).

A plasmid coding for a model viral RNA (vRNA), consisting of the firefly luciferase (FF) open reading frame flanked by the noncoding regions of segment 8 of an H5N1 influenza A virus under the control of a human pPolI was used for minigenome assays (Manz 2016). Production of mRNA of this FF vRNA is solely possible by transcription of the produced vRNA by the influenza virus polymerase complex. Therefore, the FF activity is a measure of the amount of mRNA produced and thereby of the polymerase complex activity. Transfection of pRL (Promega) served as an internal control to normalize variation in transfection efficiency and sample processing.

HEK-293T cells were seeded one day prior to the experiment into 96 wells plates. 25 ng of the FF reporter plasmid, 50 ng of each of the plasmids encoding PB2, PB1, and PA and 100 ng of NP and 2 ng of the Renilla luciferase expression plasmid in 50 ul Opti-MEM (Gibco, Thermo Fisher) were mixed with 50 ul Optim-mem containing Lipofectamine 2000 (Invitrogen, Thermo Fisher) in a 1:3 ratio and incubated for 20 minutes at room temperature. 20 ul of the transfection mixture was added to each well. Each transfection was performed in quadruplo in at least two independent experiments. 24 h post transfection, luminescence was measured using the Dual-Luciferase Reporter Assay System (Promega) using a GloMax luminometer according to the manufacturer’s instructions (Turner BioSystems).

*Molecular Modelling*

All structural inferences were made using the polymerase complex of A/little yellow-shouldered bat/Guatemala/060/2010 (H17N10, PDB: 4WSB) with YASARA, version 18.2.7 ([www.yasara.org](http://www.yasara.org)).

***Phylogenetic analyses of consensus HA sequences***

HA sequences from the current work (n=42) were collated with the sequence set (n=238) of the systematically condensed A/goose/Guangdong /1/1996 (Gs/GD/96)-like HA phylogeny underlying the WHO/FAO/OIE H5 nomenclature system, downloaded from GISAID11. Sequences were aligned with MAFFT v7.39712. A maximum likelihood phylogenetic tree was constructed with RAxML 8.2.12 under the GTRGAMMA model, and rooted to Gs/GD/9613. The phylogenetic tree was visualized using ggtree14.

**Figure S2: Phylogenetic tree of the 42 H5N1 HA sequences from the current study in addition to the condensed sequence set representing the most recent WHO/FAO/OIE Gs/GD/96-like H5 nomenclature (n=280).** **Sequences from the current study are highlighted in green (branches), with sample IDs annotated as specified in table S2. Tips are coloured according to the most recent WHO/FAO/OIE H5 clade designation, indicated by the bar and annotation.1**

***Genetic variation and minority proportion***

5608 variants are observed within the initial specimens from the 44 patients (**Table S9**), which were found across 4191 positions with sequence information. See **Table S3**.

**Table S3. Number of positions across the genome where single and multiple variants were identified in the initial 44 samples of H5N1-infected patients.**

| **# Amino acids per position** | Number of positions (%) | |
| --- | --- | --- |
| **1** | 2986 | (71.25%) |
| **2** | 1019 | (24.31 %) |
| **3** | 163 | (3.89%) |
| **4** | 21 | (0.50%) |
| **5** | 1 | (0.02%) |
| **6** | 1 | (0.02%) |

We used mean minority proportion (MMP) to quantify the within host virus diversity during H5N1 infections. The mean minority proportion at genomic position *p* is defined as:

MMP(*p*) = x 100%

For sample *s* running from 1 to *n* samples, where the number of samples *n* on a given position is dependent on the availability of sequencing data. Before assessing the number of reads with a non-consensus amino acid residue, any variants that were present at <1% or with <5 reads were removed.

Note that sample-specific consensus sequences were used to determine the minority proportion per position for each sample. If no sequencing information was present, the sample was excluded for the position, but if a single amino acid was detected, the minority proportion 0 was used in the calculation of the average.

***Comparison between NGS data with a subset of avian reference sequences: root mean square deviation analyses***

To determine which amino acid positions differed most between human and avian A(H5N1) samples we calculated the root mean squared deviation (RMSD) per amino acid position. In short, the RMSD is a measure for genetic distance a group of sequences and one or multiple reference sequences and visualizes the difference in amino acid distributions between our next generation sequencing data and the sequences of a set of representative chicken H5N1 isolates from Indonesia. RMSD values, adapted to amino acid distributions, were calculated as described in detail by Li *et al.*15

*P*[X*i,p*] is the proportion of amino acid *p*, at position *i*, for NGS sample X and *P*[Y*i,p*] is the frequency of amino acid *p*, at position *i*, for the reference set Y, respectively. The amino acid, p, is an element of the amino acid set { }. The position, i, ranges from 1 to the length protein sequence of each gene. The denominator within the square root operator, 20, is the number of possible amino acids. The minimum RMSD value of 0 occurs when the distribution of amino acids is identical between the NGS sample and the refence alignments for that specific position. High values indicate large difference sin distribution.

The avian H5N1 reference set we selected consists of 19 spatio-temporally matched isolates for which full genome sequences were available: A/chicken/East Java/UT6016/2006, A/chicken/East Java/UT6019/2006, A/chicken/East Java/UT6021/2006, A/chicken/Banten/UT6025/2006, A/chicken/South Kalimantan/UT6029/2006, A/chicken/East Java/UT6031/2007, A/chicken/East Java/UT6044/2007, A/chicken/East Java/UT6045/2007, A/chicken/East Java/UT6017/2006, A/chicken/East Java/UT6020/2006, A/chicken/East Java/UT6023/2006, A/chicken/South Kalimantan/UT6028/2006, A/chicken/Bali/U8661/2009, A/chicken/Pekalongan/BBVW/2007, A/chicken/West Java/TJA/2008, A/chicken/West Java/SMI-PAT/2006, A/chicken/West Java/TASIKO B/2006, A/chicken/Garut/BBVW-223/2007.

The amino acid frequencies of the two data sets were compared for each position to obtain the RMSD, plotted in **Figure S3**. We excluded positions without sequencing coverage and primer positions. Using the RMSD to evaluate to what extend the genetic variation observed in our human NGS data resembles the genetic variation in the avian sequences, we did detect genome positions within all viral proteins, substantially differing between our NGS data and the reference set.

**Figure S3. RMSD analyses of next generation avian and human sequencing data**. Protein residues with highest RMSD values that were included in phenotypic assays are indicated (*see also* **Table S10**).

***Prevalence of observed variants in publicly available consensus sequences of human and avian H5N1 isolates***

We analyzed all amino acid variants detected by direct NGS in specimens from H5N1-infected patients in the context of currently available sequence information in public databases of H5N1 virus isolates of human and avian origin.

All available H5N1 sequences as of January 2015 were downloaded from the GISAID EpiFlu database (<http://platform.gisaid.org>) and NCBI Influenza Virus Resource database (<http://www.ncbi.nlm.nih.gov/genomes/FLU/FLU.html>). Both sequence databases were combined as not all available sequences are uploaded to both databases. All sequences were aligned to reference strain A/Indonesia/5/2005 using MAFFT version 7 (<http://mafft.cbrc.jp/alignment/server/>)16. All insertions were excluded for further analyses. For all NA sequences the 16 amino acid deletion in the stem domain was included and the multibasic cleavage site within HA was converted to the same length as the used reference strain to obtain uniform numbering with the reference strain.

To remove duplicate sequences for subsequent analyses, an extensive clean-up of all sequences was performed. Duplicate sequences within databases or between the two databases were checked by identifying identical virus strain names, in case identical isolates were sequenced and uploaded by different users, also considering both two and four digit year annotations. When duplicate strains were identified, linked sequences were checked and in case of identical sequence, only a single sequence was kept for further analyses. In case of different coverages of the gene, the longest sequence or, in case of identical length, the sequence with the least amount of gaps was kept. If the linked sequences were not identical, both sequences were kept to avoid exclusion of database variants.

Next, we calculated the prevalence of each amino acid at every position of the influenza genome, for both the avian and human H5N1 strains. Analyses were performed using all available avian and human H5N1 sequences as well as clade 2.1 sequences originating from Indonesia only. Bioinformatic scripts for database cleanups and matrix calculations were coded using Python and .NET C#, respectively.

In **Figure 2A**, each dot represents a variant found in our data set, irrespective of its prevalence among the samples and the proportion within the viral population in samples where it was found. The color of the dot indicates the gene segment. The x-axis in this figure represents the fraction of sequences of H5N1 isolates of avian origin containing this variant, while the y-axis represents the fraction in virus sequences of human origin. In **Figure 2B**, the size of the dots reflects the fraction of samples with information on this position that contains this variant, and the color represents the average proportion of this variant in the viral population across all samples containing this variant. **Table S4** enumerates per-gene metrics for the data presented in **Figure 2**.

**Table S4. The number of variants in each gene and correlation between prevalences in human and avian sequences.**

| **Gene** | Number of variants | # variants/  length genome | Correlation human% vs avian% |
| --- | --- | --- | --- |
| **PB2** | 917 | 1.21 | 0.986 |
| **PB1** | 918 | 1.21 | 0.997 |
| **PB1-F2** | 125 | 1.37 | 0.964 |
| **PA** | 897 | 1.25 | 0.988 |
| **HA** | 702 | 1.24 | 0.996 |
| **NP** | 579 | 1.15 | 0.995 |
| **NA** | 551 | 1.17 | 0.998 |
| **M1** | 312 | 1.23 | 0.987 |
| **M2** | 143 | 1.46 | 0.967 |
| **NS1** | 314 | 1.39 | 0.988 |
| **NS2** | 150 | 1.23 | 0.991 |

To analyze differences in prevalence of observed variants in publicly available sequences of avian and human H5N1 isolates, respectively, we excluded variants that were common (>90%) in both. Remaining variants were subsequently classified into two groups: those with higher prevalences in human than in avian sequence databases (i.e. variants above the diagonal line in Figure 2) and variants not displaying a human-preference (i.e. variants below or on the diagonal line). There were 201 variants above the diagonal, 225 below, and 1034 variants on the diagonal. Differences between the two groups were analyzed using a one-sided t-test. When comparing these groups, we observed highly significant differences in (1) the fraction of our patient samples that contained a given variant (indicated by dot size; p<<00001), (2) the average proportion within samples containing the variant (indicated by color; p<<00001), and (3) a combination of both by multiplying the fraction of samples with the average proportion within samples containing the variant (p<<00001).

***Previously unreported variants***

The distribution of previously unreported variants across the entire genome depicted in **Figure 3** is enumerated per gene in **Table S5**; the number of variants found per gene is highly correlated with the length of the gene (r = 0.93, p = 3.7x10-5).

**Table S5. Numbers of observed variants not reported in publicly available H5N1 sequences, per gene.**

| **Gene** | Number of novel variants | Normalized per length gene**1** |
| --- | --- | --- |
| **PB2** | 70 | 0.092 |
| **PB1** | 97 | 0.128 |
| **PB1-F2** | 4 | 0.044 |
| **PA** | 84 | 0.117 |
| **HA** | 45 | 0.079 |
| **NP** | 54 | 0.107 |
| **NA** | 30 | 0.064 |
| **M1** | 42 | 0.166 |
| **M2** | 10 | 0.102 |
| **NS1** | 18 | 0.080 |
| **NS2** | 13 | 0.107 |

**1** The number of novel variants was divided by the amino acid length of each gene.

***Sequential samples***

**Figure S4** accompanies **Figure 4**, as it shows the decreases of 1% and larger in the 8 sequential sample pairs.

**Figure S4: Proportions of variants that decrease at least 1% across the 8 sequential sample pairs.**

The number of increasing variants per gene correlated with the length of the gene (R = 0.96 for increases > 1%, R = 0.92 for increases > 5%, see **Table S6**).

**Table S6: Frequency of >5% increases of variants in sequential specimens, per gene**

| **Gene** | Number of times increase >5% |
| --- | --- |
| **PB2** | 11 |
| **PB1** | 11 |
| **PB1-F2** | 0 |
| **PA** | 15 |
| **HA** | 12 |
| **NP** | 8 |
| **NA** | 7 |
| **M1** | 3 |
| **M2** | 0 |
| **NS1** | 7 |
| **NS2** | 3 |

**Table S7: Site specific overview increases of variants >5% in sequential specimens, per sample pair**

| **pair** | **segment** | **position** | **AA** | **t=1*** | **t=2** | **(t=2)-(t=1)** |
| --- | --- | --- | --- | --- | --- | --- |
| 7 - 8 | HA1 | 510 | K | bdt | 37,6 | 37,6 |
| 7 - 8 | NS1 | 109 | C | bdt | 26,3 | 26,3 |
| 7 - 8 | HA | 525 | E | 74,2 | 99,8 | 25,6 |
| 7 - 8 | NP | 295 | G | 79,0 | 100 | 21,1 |
| 7 - 8 | PB1 | 398* | D | 90,4 | 100 | 9,6 |
| 7 - 8 | PB1 | 387 | K | 90,9 | 100 | 9,1 |
|  |  |  |  |  |  |  |
| 16 - 17 | PB2 | 323* | L | 4,1 | 30,2 | 26,1 |
| 16 - 17 | PB1 | 254 | C | bdt | 23,5 | 23,5 |
| 16 - 17 | NP | 271 | G | bdt | 12,8 | 12,8 |
| 16 - 17 | PA | 254 | N | bdt | 10,4 | 10,4 |
| 16 - 17 | HA | 242 | I | bdt | 9,5 | 9,5 |
| 16 - 17 | PB2 | 512* | P | bdt | 9,5 | 9,5 |
| 16 - 17 | PA | 14 | I | 2,5 | 11,9 | 9,5 |
| 16 - 17 | HA | 559 | S | bdt | 9,1 | 9,1 |
| 16 - 17 | M1 | 89 | N | bdt | 8,8 | 8,8 |
| 16 - 17 | PB1 | 208* | K | 93,6 | 100 | 6,4 |
| 16 - 17 | PB2 | 62* | K | bdt | 5,4 | 5,4 |
| 16 - 17 | PA | 610 | E | 94,7 | 100 | 5,3 |
| 16 - 17 | PA | 313 | A | bdt | 5,2 | 5,2 |
|  |  |  |  |  |  |  |
| 36 - 39 | PB1 | 208* | K | 82,1 | 100 | 18,0 |
| 36 - 39 | NA | 239 | E | bdt | 8,6 | 8,6 |
| 36 - 39 | PB1 | 524* | N | bdt | 5,1 | 5,1 |
|  |  |  |  |  |  |  |
| 69 - 70 | PB2 | 461 | V | 5,7 | 46,0 | 40,3 |
| 69 - 70 | NA | 258 | E | 71,4 | 100 | 28,6 |
| 69 - 70 | PB2 | 323* | L | bdt | 25,5 | 25,5 |
| 69 - 70 | PB1 | 535 | T | bdt | 21,4 | 21,4 |
| 69 - 70 | NP | 301 | V | 24,4 | 45,2 | 20,8 |
| 69 - 70 | PB2 | 586 | K | 81,5 | 100 | 18,5 |
| 69 - 70 | NS1 | 4 | N | 85,3 | 100 | 14,7 |
| 69 - 70 | NS2 | 4 | N | 85,3 | 100 | 14,7 |
| 69 - 70 | PA | 441 | M | 85,6 | 100 | 14,4 |
| 69 - 70 | NA | 292 | Y | 87,5 | 100 | 12,5 |
| 69 - 70 | PB2 | 109* | V | 87,5 | 99,9 | 12,4 |
| 69 - 70 | NS1 | 96 | D | 88,6 | 100 | 11,4 |
| 69 - 70 | NS1 | 98 | L | bdt | 10,3 | 10,3 |
| 69 - 70 | PA | 617 | G | 5,9 | 15,9 | 1bdt |
| 69 - 70 | HA | 250 | K | 90,3 | 99,9 | 9,6 |
| 69 - 70 | PB2 | 412 | K | 90,9 | 100 | 9,1 |
| 69 - 70 | PA | 497* | K | 91,1 | 100 | 8,9 |
| 69 - 70 | HA | 353 | A | 91,6 | 99,9 | 8,3 |
| 69 - 70 | HA | 161 | R | 91,9 | 100 | 8,1 |
| 69 - 70 | NP | 485 | R | bdt | 7,0 | 7,0 |
| 69 - 70 | HA | 282 | E | 1,1 | 7,9 | 6,8 |
| 69 - 70 | PB2 | 147* | V | bdt | 6,7 | 6,7 |
| 69 - 70 | NP | 6 | I | bdt | 6,2 | 6,2 |
| 69 - 70 | NS2 | 47 | K | bdt | 5,9 | 5,9 |
| 69 - 70 | NS1 | 199 | K | bdt | 5,8 | 5,8 |
| 69 - 70 | HA | 512 | A | 94,1 | 99,9 | 5,8 |
| 69 - 70 | PA | 129 | T | 94,3 | 100 | 5,7 |
| 69 - 70 | PB2 | 74* | R | bdt | 5,6 | 5,6 |
| 69 - 70 | PA | 86* | M | 94,3 | 99,8 | 5,5 |
| 69 - 70 | NP | 89 | S | bdt | 5,3 | 5,3 |
| 69 - 70 | PA | 426 | G | bdt | 5,1 | 5,1 |
|  |  |  |  |  |  |  |
| 78 - 79 | PA | 86* | V | bdt | 40,5 | 40,5 |
| 78 - 79 | NP | 371 | V | bdt | 10,6 | 10,6 |
| 78 - 79 | M1 | 166 | T | bdt | 8,3 | 8,3 |
| 78 - 79 | M1 | 166 | V | bdt | 8,3 | 8,3 |
| 78 - 79 | NA | 62 | P | bdt | 8,1 | 8,1 |
| 78 - 79 | NA | 41 | E | bdt | 8,0 | 8,0 |
| 78 - 79 | NA | 46 | I | bdt | 5,5 | 5,5 |
| 78 - 79 | NA | 61 | A | bdt | 5,2 | 5,2 |
|  |  |  |  |  |  |  |
| 81 - 82 | HA | 141 | H | 49,0 | 64,4 | 15,4 |
| 81 - 82 | PA | 345 | L | 88,9 | 100 | 11,1 |
| 81 - 82 | NP | 346 | L | bdt | 5,7 | 5,7 |
| 81 - 82 | PA | 461* | K | 94,4 | 100 | 5,6 |
| 81 - 82 | PA | 339 | K | 94,4 | 100 | 5,6 |
| 81 - 82 | HA | 202 | E | 92,3 | 97,3 | 5,0 |
|  |  |  |  |  |  |  |
| 87 - 88 | PB1 | 538 | D | 76,6 | 99,9 | 23,3 |
| 87 - 88 | PB1 | 389 | I | 77,8 | 100 | 22,2 |
| 87 - 88 | NS1 | 9 | F | 90,9 | 100 | 9,1 |
| 87 - 88 | NS2 | 9 | F | 90,9 | 100 | 9,1 |
| 87 - 88 | HA | 474 | D | 93,2 | 100 | 6,8 |
| 87 - 88 | PB1 | 537* | N | 93,3 | 100 | 6,7 |
| 87 - 88 | PA | 404 | A | 93,5 | 100 | 6,5 |
| 87 - 88 | NS1 | 128 | N | 93,8 | 100 | 6,3 |
| 87 - 88 | PB1 | 216 | S | 94,4 | 99,6 | 5,2 |
| 93 - 97 | PB2 | 501 | F | 91,7 | 100 | 8,3 |

1HA numbering according to H5 numbering, including signal peptide

*Polymerase complex variants included in phenotypic assays (Figure 5, Table S10)

***Sensitivity analyses***

Sensitivity analyses were performed to assess whether results of our analyses were affected by the chosen cut-offs for inclusion of a variant, namely the threshold for the minimum proportion in the viral population (1%) and the minimum number of 5 sequence reads for the variant in the sample. For these sensitivity analyses proportion cutoffs of 1% (as in primary analysis) and 5% were used, and sequence read cutoffs of 3, 5 (as in primary analysis), 10 or 50 reads. **Figures S5-7** and **Table S8** below show the results of these analyses, indicating that our main results and conclusions were only marginally affected by different cut-off settings.

**Figure S5: Variants detected with NGS in the context of their prevalences in publicly available sequences of human and avian H5N1 viruses using different cutoffs for inclusion of data.**

**Table S8: Statistical analyses of data in Figure S3.**

|  | Pearson R* | p-value‡ |
| --- | --- | --- |
| **1%, 3 reads** | 0.992 | <<0.0001 |
| **1%, 5 reads** | 0.991 | <<0.0001 |
| **1%, 10 reads** | 0.989 | <<0.0001 |
| **1%, 50 reads** | 0.981 | <<0.0001 |
| **5%, 3 reads** | 0.983 | <<0.0001 |
| **5%, 5 reads** | 0.982 | <<0.0001 |
| **5%, 10 reads** | 0.982 | <<0.0001 |
| **5%, 50 reads** | 0.979 | <<0.0001 |

* For all variants observed in our patients, the correlation between the prevalence in publicly available consensus sequences of Indonesian H5N1 viruses from human and avian origin. ‡ p-value demonstrating that variants that are present at <90% in avian and human databases and exist at higher prevalences and larger proportions in our sample were more prevalent in sequences from Indonesian human than avian H5N1 isolates.

**Figure S6: The prevalence and average proportion of variants not reported in publicly available H5N1 sequences, using different cut-offs for inclusion of data. The y-axis indicates the average proportion across the samples in which this variant was found, the color indicates the number of patients with the variant.**

**Figure S7: Variants that increase at least 1% in sequential sample pairs, using different cut-offs for inclusion of data. Each line represents a single amino acid variant, and shows enrichment of variants present at the first time point as well as emergence of previously undetected variants.**

***Graphical representation of variants selected for phenotypic characterization***

For phenotypic characterization of other observed substitutions, we selected a subset of variants that were preferentially observed in previously reported human isolates (top left section of and those that were not previously reported in H5N1 viruses. Figure S8 and S9 show variants selected based upon Figure 2 and Figure 3 respectively.

**Figure S8: Prevalence of variants observed during human infection in publicly available sequences from avian (x-axis) and human (y-axis) H5N1 isolates from Indonesia. Each variant, defined as a unique combination of position and amino acid, is represented by a dot. (A) Prevalence of variants per viral segment, as depicted in Figure 2 of the manuscript. Colors indicate viral proteins. (B) Prevalence of PB2, PB1 and PA variants included in the polymerase assays (Figure 5). (C) Prevalence of PB2, PB1 and PA variants included in polymerase assays appearing in low frequency (< 30%) in human and avian databases.**

**Figure S9: The prevalence and average proportion of variants not previously reported in publicly available H5N1 sequences. The symbol color indicates the number of samples in which a variant was detected. (A) Full data set, see also Figure 3. (B) The subset of PB2 and PB1 variants included in polymerase assays (Figure 5).**

***References***

1 Hoffmann, E., Stech, J., Guan, Y., Webster, R. G. & Perez, D. R. Universal primer set for the full-length amplification of all influenza A viruses. *Arch Virol* **146**, 2275-2289 (2001).

2 Linster, M. *et al.* Identification, characterization, and natural selection of mutations driving airborne transmission of A/H5N1 virus. *Cell* **157**, 329-339, doi:10.1016/j.cell.2014.02.040 (2014).

3 Salzberg, S. L. *et al.* Genome analysis linking recent European and African influenza (H5N1) viruses. *Emerg Infect Dis* **13**, 713-718, doi:10.3201/eid1305.070013 (2007).

4 Watson, S. J. *et al.* Viral population analysis and minority-variant detection using short read next-generation sequencing. *Philos Trans R Soc Lond B Biol Sci* **368**, 20120205, doi:10.1098/rstb.2012.0205 (2013).

5 Li, H. & Durbin, R. Fast and accurate short read alignment with Burrows-Wheeler transform. *Bioinformatics* **25**, 1754-1760, doi:10.1093/bioinformatics/btp324 (2009).

6 Li, H. *et al.* The Sequence Alignment/Map format and SAMtools. *Bioinformatics* **25**, 2078-2079, doi:10.1093/bioinformatics/btp352 (2009).

7 Burke, D. F. & Smith, D. J. A recommended numbering scheme for influenza A HA subtypes. *PLoS One* **9**, e112302, doi:10.1371/journal.pone.0112302 (2014).

8 Welkers, M. R., Jonges, M., Jeeninga, R. E., Koopmans, M. P. & de Jong, M. D. Improved detection of artifactual viral minority variants in high-throughput sequencing data. *Front Microbiol* **5**, 804, doi:10.3389/fmicb.2014.00804 (2014).

9 Wilker, P. R. *et al.* Selection on haemagglutinin imposes a bottleneck during mammalian transmission of reassortant H5N1 influenza viruses. *Nat Commun* **4**, 2636, doi:10.1038/ncomms3636 (2013).

10 Binley, J. M. *et al.* A recombinant human immunodeficiency virus type 1 envelope glycoprotein complex stabilized by an intermolecular disulfide bond between the gp120 and gp41 subunits is an antigenic mimic of the trimeric virion-associated structure. *J Virol* **74**, 627-643 (2000).

11 World Health Organization/World Organisation for Animal, H. F. & Agriculture Organization, H. N. E. W. G. Revised and updated nomenclature for highly pathogenic avian influenza A (H5N1) viruses. *Influenza Other Respir Viruses* **8**, 384-388, doi:10.1111/irv.12230 (2014).

12 Katoh, K., Misawa, K., Kuma, K. & Miyata, T. MAFFT: a novel method for rapid multiple sequence alignment based on fast Fourier transform. *Nucleic Acids Res* **30**, 3059-3066 (2002).

13 Stamatakis, A. RAxML version 8: a tool for phylogenetic analysis and post-analysis of large phylogenies. *Bioinformatics* **30**, 1312-1313, doi:10.1093/bioinformatics/btu033 (2014).

14 Guangchuang, Y., K., S. D., Huachen, Z., Yi, G. & Tsan-Yuk, L. T. ggtree: an r package for visualization and annotation of phylogenetic trees with their covariates and other associated data. *Methods in Ecology and Evolution* **8**, 28-36, doi:doi:10.1111/2041-210X.12628 (2017).

15 Li, K. *et al.* ANDES: Statistical tools for the ANalyses of DEep Sequencing. *BMC Res Notes* **3**, 199, doi:10.1186/1756-0500-3-199 (2010).

16 Katoh, K. & Standley, D. M. MAFFT multiple sequence alignment software version 7: improvements in performance and usability. *Mol Biol Evol* **30**, 772-780, doi:10.1093/molbev/mst010 (2013).
